# Supplementary material for: Integrating hierarchical porous nanosheets in the design of carbon cloth-based sandwiched sulfur cathodes to achieve high areal capacity in lithium sulfur batteries
Source: Royal Society of Chemistry journal article supplement (doi:10.1039/d0se00031k), 2020-01-01
Supplement: d0se00031k1.pdf [file d0se00031k1.pdf]

## Supplementary Information

Integrating Hierarchical Porous Nanosheets in the Design of Carbon  
Cloth-based Sandwiched Sulfur Cathodes to Achieve High Areal  
Capacity in Lithium Sulfur Batteries

*Yu Fu<sup>a</sup>, Kui Cheng<sup>b</sup>, Jing Hu<sup>a</sup>, and Limin Zhou<sup>a\*</sup>*

## Supporting Figures

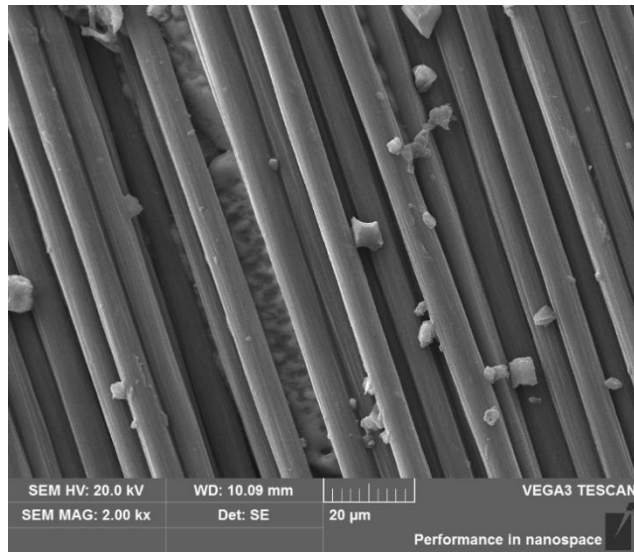

Fig. S1 Sulfur distribution on a CC with a mass loading of ~6 mg/cm<sup>2</sup>.

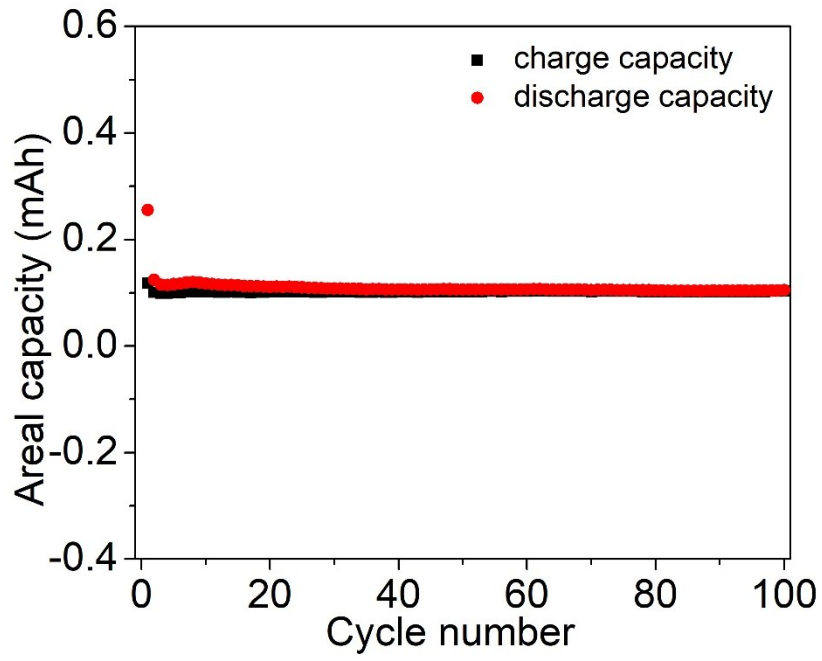

Fig. S2 Areal capacity of a 1-cm<sup>2</sup> CC@pCo<sub>3</sub>O<sub>4</sub> substrate.
